# Supplementary material for: Incorporation of inorganic fullerene-like WS2 into poly(ethylene succinate) to prepare novel biodegradable nanocomposites: a study on isothermal and dynamic crystallization
Source: Royal Society of Chemistry journal article supplement (doi:10.1039/c5ra24898a), 2016-01-01
Supplement: c5ra24898a1.pdf [file c5ra24898a1.pdf]

## Supporting Information

### Incorporation of inorganic fullerene-like WS<sub>2</sub> into poly(ethylene succinate) to prepare novel biodegradable nanocomposites: A study on isothermal and dynamic crystallization

Vahid Asadi, Seyed Hassan Jafari, Hossein Ali Khonakdar, Liane Häußler and Udo Wagenknecht

The most important characteristic DSC data obtained from both isothermal and non-isothermal crystallization are as follows:

**Table S1:** DSC data obtained from isothermal mode

|                           | Isothermal state       |                                        |                            |                          | Heating                 |                           |                         |                         |                          |                       |
|---------------------------|------------------------|----------------------------------------|----------------------------|--------------------------|-------------------------|---------------------------|-------------------------|-------------------------|--------------------------|-----------------------|
|                           | T <sub>C</sub><br>(°C) | t <sub>max</sub> <sup>a</sup><br>(min) | FWHM <sup>b</sup><br>(min) | ΔH <sub>C</sub><br>(J/g) | T <sub>CC</sub><br>(°C) | ΔH <sub>CC</sub><br>(J/g) | T <sub>m1</sub><br>(°C) | T <sub>m2</sub><br>(°C) | ΔH <sub>m</sub><br>(J/g) | X <sub>C</sub><br>(%) |
| PES                       | 30                     | 7.56                                   | 8.54                       | 53.7                     | 73.6                    | 8.4                       | 89.0                    | 99.6                    | 67.5                     | 37.5                  |
|                           | 40                     | 4.98                                   | 5.37                       | 57.4                     | 74.7                    | 9.1                       | 88.9                    | 99.8                    | 67.1                     | 37.3                  |
|                           | 50                     | 4.86                                   | 5.28                       | 60.6                     | 77.0                    | 8.9                       | 89.5                    | 99.6                    | 68.2                     | 37.9                  |
|                           | 60                     | 8.49                                   | 9.86                       | 62.4                     | 81.3                    | 6.4                       | 91.3                    | 99.5                    | 70.7                     | 39.3                  |
| IF-WS <sub>2</sub> (0.1%) | 30                     | 1.80                                   | 1.23                       | 47.4                     | 73.0                    | 9.1                       | 88.6                    | 99.5                    | 73.5                     | 40.9                  |
|                           | 40                     | 1.65                                   | 1.35                       | 46.2                     | 74.4                    | 9.8                       | 88.4                    | 99.4                    | 72.9                     | 40.5                  |
|                           | 50                     | 1.65                                   | 1.40                       | 51.2                     | 77.2                    | 9.5                       | 89.4                    | 99.7                    | 74.0                     | 41.2                  |
|                           | 60                     | 2.64                                   | 2.38                       | 61.0                     | 81.4                    | 7.5                       | 91.5                    | 99.7                    | 75.6                     | 42.0                  |
| IF-WS <sub>2</sub> (0.2%) | 30                     | 2.43                                   | 2.24                       | 39.4                     | 73.0                    | 9.0                       | 88.0                    | 99.3                    | 72.8                     | 40.5                  |
|                           | 40                     | 1.29                                   | 1.04                       | 41.7                     | 74.4                    | 9.8                       | 88.3                    | 99.4                    | 72.0                     | 40.1                  |
|                           | 50                     | 1.26                                   | 0.94                       | 50.2                     | 77.2                    | 9.5                       | 89.3                    | 99.6                    | 73.1                     | 40.7                  |
|                           | 60                     | 2.28                                   | 1.81                       | 60.9                     | 81.4                    | 5.4                       | 91.3                    | 99.4                    | 74.6                     | 41.5                  |
| IF-WS <sub>2</sub> (0.5%) | 30                     | 5.94                                   | 6.22                       | 49.1                     | 73.0                    | 9.0                       | 88.0                    | 99.8                    | 72.3                     | 40.4                  |
|                           | 40                     | 3.39                                   | 3.60                       | 50.4                     | 74.4                    | 9.7                       | 88.6                    | 99.7                    | 71.8                     | 40.1                  |
|                           | 50                     | 3.06                                   | 3.03                       | 54.5                     | 77.2                    | 9.4                       | 89.4                    | 99.8                    | 72.9                     | 40.7                  |
|                           | 60                     | 4.80                                   | 5.02                       | 61.2                     | 81.3                    | 7.2                       | 91.4                    | 100.0                   | 74.4                     | 41.5                  |
| IF-WS <sub>2</sub> (1.0%) | 30                     | 3.60                                   | 3.74                       | 41.2                     | 73.0                    | 9.0                       | 88.0                    | 99.6                    | 71.6                     | 40.2                  |
|                           | 40                     | 2.10                                   | 2.01                       | 43.1                     | 74.4                    | 9.7                       | 88.7                    | 99.8                    | 71.2                     | 40.0                  |
|                           | 50                     | 1.95                                   | 1.77                       | 50.3                     | 77.2                    | 9.4                       | 89.4                    | 99.7                    | 72.1                     | 40.5                  |
|                           | 60                     | 3.18                                   | 2.98                       | 59.9                     | 81.3                    | 6.6                       | 91.3                    | 99.8                    | 74.8                     | 42.0                  |

<sup>a</sup>Time to reach the maximum rate of crystallization obtained experimentally

<sup>b</sup>Full width at half maximum

**Table S2:** DSC data obtained from non-isothermal mode

|                           | IF-WS <sub>2</sub><br>Content<br>(%) | Cooling                |                        |                         |                          |                       | Heating (10 °C/min)    |                                       |                                         |                                       |                                         |                         |                         |                           |  |
|---------------------------|--------------------------------------|------------------------|------------------------|-------------------------|--------------------------|-----------------------|------------------------|---------------------------------------|-----------------------------------------|---------------------------------------|-----------------------------------------|-------------------------|-------------------------|---------------------------|--|
|                           |                                      | T <sub>c</sub><br>(°C) | T <sub>0</sub><br>(°C) | ΔT <sub>c</sub><br>(°C) | ΔH <sub>c</sub><br>(J/g) | X <sub>c</sub><br>(%) | T <sub>g</sub><br>(°C) | T <sub>CC1</sub> <sup>a</sup><br>(°C) | ΔH <sub>CC1</sub> <sup>a</sup><br>(J/g) | T <sub>CC2</sub> <sup>b</sup><br>(°C) | ΔH <sub>CC2</sub> <sup>b</sup><br>(J/g) | T <sub>m1</sub><br>(°C) | T <sub>m2</sub><br>(°C) | ΣΔH <sub>m</sub><br>(J/g) |  |
| Cooling rate<br>2 °C/min  | PES                                  | 50.7                   | 60.7                   | 10.0                    | 66.2                     | 36.8                  | -10                    | –                                     | –                                       | 77.5                                  | 8.5                                     | 90.1                    | 99.8                    | 70.4                      |  |
|                           | 0.1                                  | 58.0                   | 64.8                   | 6.3                     | 66.1                     | 36.7                  | -11                    | –                                     | –                                       | 81.0                                  | 6.6                                     | 91.5                    | 99.7                    | 73.3                      |  |
|                           | 0.2                                  | 58.9                   | 64.5                   | 5.6                     | 65.7                     | 36.5                  | -10                    | –                                     | –                                       | 81.5                                  | 6.2                                     | 91.5                    | 99.6                    | 73.1                      |  |
|                           | 0.5                                  | 55.3                   | 63.6                   | 8.3                     | 64.0                     | 35.6                  | -11                    | –                                     | –                                       | 80.4                                  | 7.1                                     | 91.1                    | 99.8                    | 71.7                      |  |
|                           | 1.0                                  | 57.1                   | 63.6                   | 6.5                     | 64.5                     | 35.8                  | -11                    | –                                     | –                                       | 80.4                                  | 7.2                                     | 91.1                    | 99.8                    | 71.4                      |  |
| Cooling rate<br>5 °C/min  | PES                                  | 40.6                   | 56.5                   | 15.9                    | 37.2                     | 20.7                  | -15                    | 42.2                                  | 20.6                                    | 75.1                                  | 9.0                                     | 88.2                    | 99.8                    | 71.3                      |  |
|                           | 0.1                                  | 49.5                   | 59.9                   | 10.4                    | 68.6                     | 38.1                  | -11                    | –                                     | –                                       | 76.9                                  | 8.9                                     | 89.8                    | 99.5                    | 75.9                      |  |
|                           | 0.2                                  | 51.7                   | 59.4                   | 7.7                     | 67.4                     | 37.4                  | -11                    | –                                     | –                                       | 77.9                                  | 8.7                                     | 90.0                    | 99.6                    | 75.3                      |  |
|                           | 0.5                                  | 45.0                   | 57.9                   | 12.9                    | 50.7                     | 28.2                  | -15                    | 40.0                                  | 11.6                                    | 74.9                                  | 9.9                                     | 89.5                    | 99.8                    | 74.7                      |  |
|                           | 1.0                                  | 48.9                   | 59.3                   | 10.4                    | 63.7                     | 35.4                  | -11                    | 35.1                                  | 1.3                                     | 76.8                                  | 9.7                                     | 89.7                    | 99.7                    | 72.3                      |  |
| Cooling rate<br>10 °C/min | PES                                  | 36.3                   | 53.6                   | 17.3                    | 6.7                      | 3.7                   | -16                    | 44.0                                  | 51.7                                    | 75.2                                  | 10.6                                    | 88.8                    | 99.6                    | 70.5                      |  |
|                           | 0.1                                  | 40.5                   | 56.2                   | 15.7                    | 48.4                     | 26.9                  | -16                    | 23.8                                  | 12.7                                    | 74.6                                  | 8.7                                     | 89.1                    | 99.6                    | 76.4                      |  |
|                           | 0.2                                  | 43.3                   | 55.6                   | 12.3                    | 60.7                     | 33.7                  | -15                    | 32.4                                  | 3.0                                     | 75.2                                  | 9.6                                     | 89.1                    | 99.5                    | 75.8                      |  |
|                           | 0.5                                  | 38.2                   | 55.4                   | 17.2                    | 14.8                     | 8.2                   | -16                    | 41.7                                  | 47.0                                    | 74.4                                  | 11.0                                    | 88.7                    | 99.7                    | 74.3                      |  |
|                           | 1.0                                  | 40.9                   | 55.9                   | 15.0                    | 41.9                     | 23.3                  | -15                    | 36.2                                  | 17.4                                    | 74.4                                  | 9.4                                     | 89.0                    | 99.7                    | 73.6                      |  |
| Cooling rate<br>20 °C/min | PES                                  | 34.2                   | 52.4                   | 18.2                    | 1.2                      | 0.7                   | -15                    | 43.4                                  | 57.2                                    | 75.2                                  | 10.8                                    | 88.8                    | 99.7                    | 70.2                      |  |
|                           | 0.1                                  | 34.5                   | 53.4                   | 18.9                    | 9.4                      | 5.2                   | -16                    | 27.0                                  | 53.5                                    | 72.9                                  | 10.6                                    | 88.0                    | 99.6                    | 75.0                      |  |
|                           | 0.2                                  | 35.3                   | 53.0                   | 17.7                    | 16.2                     | 9.0                   | -16                    | 33.7                                  | 45.0                                    | 73.4                                  | 10.5                                    | 88.0                    | 99.6                    | 75.4                      |  |
|                           | 0.5                                  | 34.3                   | 52.7                   | 18.4                    | 2.3                      | 1.3                   | -16                    | 42.4                                  | 59.7                                    | 74.5                                  | 11.6                                    | 88.7                    | 99.7                    | 74.0                      |  |
|                           | 1.0                                  | 35.4                   | 53.6                   | 18.2                    | 9.5                      | 5.3                   | -16                    | 37.7                                  | 50.6                                    | 74.0                                  | 10.8                                    | 88.6                    | 99.7                    | 72.9                      |  |

<sup>a</sup>The main cold crystallization; <sup>b</sup>Cold crystallization just prior to the melting endotherm

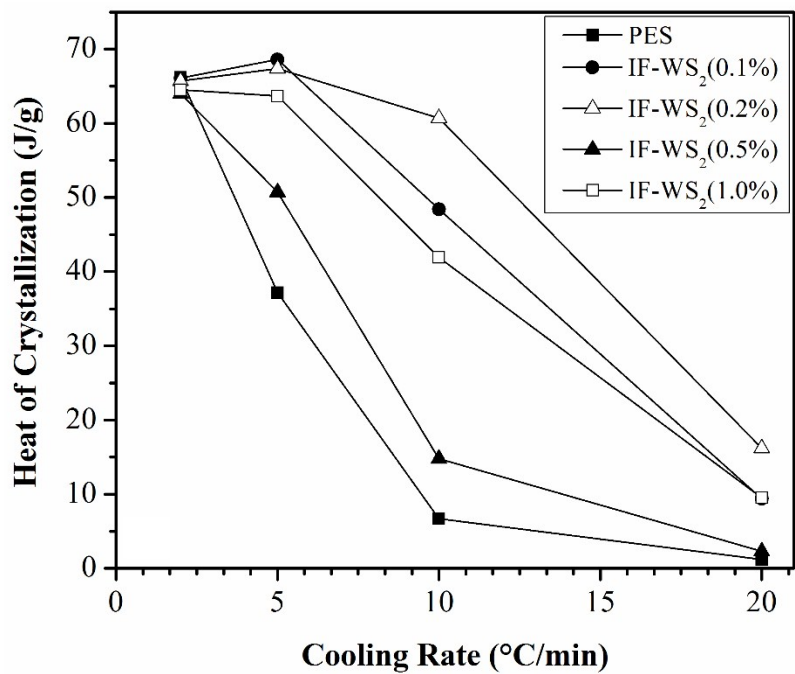

Fig. S1: Plot of heat of crystallization versus cooling rate

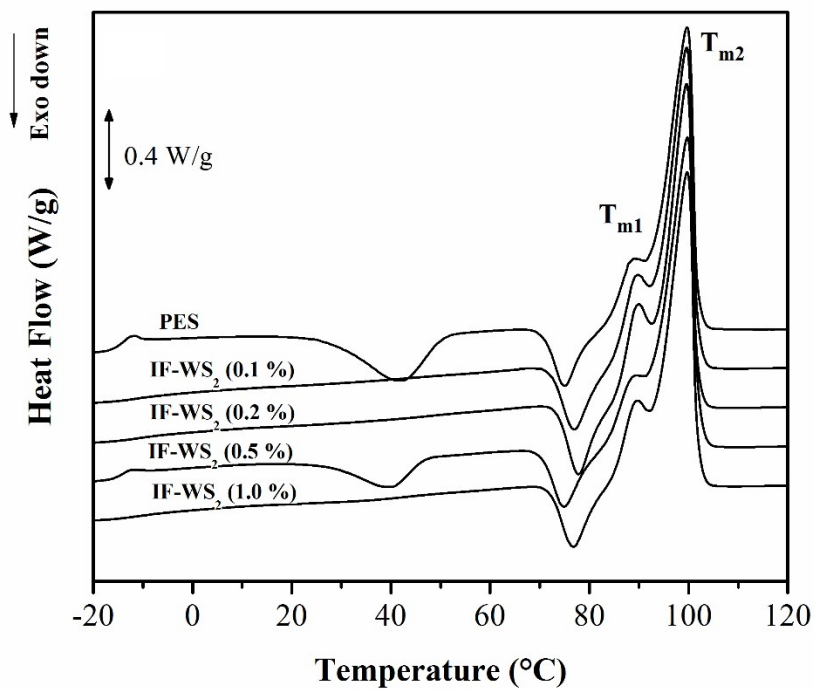

Fig. S2: Subsequent melting behavior of PES and its nanocomposites crystallized at 5 °C/min
